# Supplementary material
Source: PubMed Central journal article supplement (PMC3500548)
Supplement: supp_112.048298_supplemental_table1.pdf [file supp_112.048298_supplemental_table1.pdf]

**Cytochrome P450 3A5 Plays a Prominent Role in the Oxidative Metabolism of the Anti-HIV Drug Maraviroc**

Yanhui Lu, Craig W. Hendrix, Namandjé N. Bumpus

**Drug Metabolism and Disposition**

**Supplementary Table 1**

**Sequence of oligonucleotides used for site-directed mutagenesis for CYP3A4 and CYP3A5<sup>a</sup>.**

| <b>Mutation</b>      | <b>Oligonucleotide Sequence</b>                                                                                       |
|----------------------|-----------------------------------------------------------------------------------------------------------------------|
| <b><i>CYP3A5</i></b> |                                                                                                                       |
| L57F                 | 5'-aaatgtttgtcctatcgtcagggttctggaaattgacac-3'<br>5'-gtgtcaaattccagaaacctgacgataggacaaaacattt-3'                       |
| S107P                | 5'-cttcacaaatcgaaggccttaggccagtgagg-3'<br>5'-cccactgggcctaaaggccttcgatttgaag-3'                                       |
| L108F                | 5'-cttcacaaatcgaaggcttccggccagtgagg-3'<br>5'-cccactgggcctaaaggaccttcgatttgaag-3'                                      |
| L120I                | 5'-ttatgaaaagtccatctctatagctgaggatgaagaatgg-3'<br>5'-ccattctcatcctcagctatagatggcactttcataa-3'                         |
| F146V                | 5'-gaaaactcaaggagatggccccatcattgccag-3'<br>5'-ctgggcaatgatggggaccatctccttgagtttc-3'                                   |
| K166T                | 5'-acttgaggcgggaagcagagacggggcaagcctgt-3'<br>5'-acaggcttcccgtctctgctcccgcctcaagt-3'                                   |
| G186S                | 5'-cctacagcatggatgtgattactagcacatcatttga-3'<br>5'-tccaaatgatgtgctagtaatacatccatgctgtagg-3'                            |
| S206N                | 5'-caagaccctttgtggagaactaagaagtccataaaa-3'<br>5'-tttaggaacttcttagtctccacaaaggggtctg-3'                                |
| F210L                | 5'-tttgtggagagcactaagaagttactaaaatttggttcttagatcc-3'<br>5'-ggatctaagaaccaaatttagtaacttctagtctccacaaa-3'               |
| K212R                | 5'-ggagagcactaagaagttcctaaagatttggttcttagatccattat-3'<br>5'-ataatggatctaagaaccaaatttaggaacttcttagtctctcc-3'           |
| G214D                | 5'-gcactaagaagttcctaaaattgatttcttagatccattatttctctc-3'<br>5'-gagagaataatggatctaagaatacaatttaggaacttcttagtgc-3'        |
| L219F                | 5'-cctaaaatttggttcttagatccattcttctcaataatactcttccatt-3'<br>5'-aatggaaagagtattattgagagaaagaatggatctaagaaccaaatttagg-3' |
| I224T                | 5'-cttagatccattatttctctcaataacgctcttccattcctaccag-3'<br>5'-actggggtaaggaatggaaagagcgttattgagagaaataatggatctaag-3'     |
| V238I                | 5'-tcctaccccagttttgaagcattaaatctctctgttccaa-3'<br>5'-ttggaacagagagatattaatgctcaaaaactggggtaagga-3'                    |
| S239C                | 5'-cccagttttgaagcattaaatgtctgtctgttccaaaag-3'<br>5'-cttttggaaacagacagacatttaagcttcaaaaactgggg-3'                      |

|                      |                                                                                                                                         |
|----------------------|-----------------------------------------------------------------------------------------------------------------------------------------|
| L240V                | 5'-ccccagttttgaaacattaatgtctct <u>gt</u> gtttccaaaagata-3'<br>5'-tatcttttgaaacacagagacatttaatgcttcaaaaactgggg-3'                        |
| K243R                | 5'-tttgaagcattaatgtctctgtttcca <u>ag</u> gataaccataaatttttaagtaa-3'<br>5'-atttacttaaaaaatttatggtatctcttggaaacagagagacatttaatgcttcaaa-3' |
| A296V                | 5'-gtctgatctggagctc <u>gt</u> agcccagtcataatct-3'<br>5'-agattattgactgggctacgagctccagatcagac-3'                                          |
| V369I                | 5'-gaaacactcagattattccca <u>att</u> gctattagacttgagagga-3'<br>5'-tcctctcaagtctaataagcaattgggaataatctgagtgttc-3'                         |
| I371M                | 5'-cactcagattattccagttgctat <u>g</u> agacttgagagga-3'<br>5'-tcctctcaagtctcatagcaactgggaataatctgagtg-3'                                  |
| T376V                | 5'-ccagttgctattagacttgagagg <u>gt</u> ttgcaagaaagatggtgaaatcaa-3'<br>5'-ttgattcaacatctttctgcaaacctctcaagtctaatagcaactgg-3'              |
| S392V                | 5'-gggtattcattcccaaagg <u>gt</u> aatggtggtgattccaactt-3'<br>5'-aagtggaatcaccaccattaccctttgggaatgaataccc-3'                              |
| R415L                | 5'-agcctgaggagtcc <u>cc</u> ctgaaagggtcag-3'<br>5'-ctgaacctttcagggaggaactcctcaggct-3'                                                   |
| D477S                | 5'-tgtaaagaacacagatccccttgaaatta <u>ag</u> cacgcaaggacttctt-3'<br>5'-aagaagtccttgctgcttaattcaaggggatctgtttctttaca-3'                    |
| T478L                | 5'-aacacagatcccctgaaattagac <u>ct</u> acaaggacttctcaaccagaaaaac-3'<br>5'-gttttctggttgaagaagtccttgtaggtctaattcaaggggatctgtgtt-3'         |
| Q479G                | 5'-ccccttgaaattagacac <u>gg</u> aggacttctcaaccagaa-3'<br>5'-ttctggttgaagaagtcctcccgtgcttaattcaagggg-3'                                  |
| <b><i>CYP3A4</i></b> |                                                                                                                                         |
| F57L                 | 5'-tattttgcctaccataagggctt <u>at</u> gtatgttgacatggaatg-3'<br>5'-cattcatgtcaaacatacataagcccttatgtaggacaaaata-3'                         |
| P107S                | 5'-gtcttcacaaaccggagg <u>ag</u> ttttggtccagtgggatt-3'<br>5'-aatcccactggacaaaactcctccggtttgtgaagac-3'                                    |
| F108L                | 5'-caaaccggaggccttt <u>ag</u> gtccagtggg-3'<br>5'-cccactggacctaaaggcctccggtttg-3'                                                       |
| D214G                | 5'-caccaagaagcctttaaagattt <u>gg</u> tttttggatccattctttctt-3'<br>5'-agagaaagaatggatccaaaaacaaatcttaaaagcttcttgggtg-3'                   |
| Δ423N <sup>b</sup>   | 5'-cctgaaagattcagcaagaag---aaggacaacatagatccttac-3'<br>5'-gtaaggatctatgttgcctt---cttcttgcctgaatctttcagg-3'                              |
| L479T                | 5'-cagatccccctgaaattaagc <u>ac</u> gggaggacttctcaaccagaa-3'<br>5'-ttctggttgaagaagtcctcccgtgcttaattcaggggatctg-3'                        |

<sup>a</sup> The underlined nucleotide(s) in bold represent the introduced mutations that were used to make the desired residue changes. <sup>b</sup> Three nucleotides were omitted in the primer sequence in order to delete residue N423 of CYP3A4.
